# Supplementary material
Source: PubMed Central journal article supplement (PMC123694)

# FEMALES

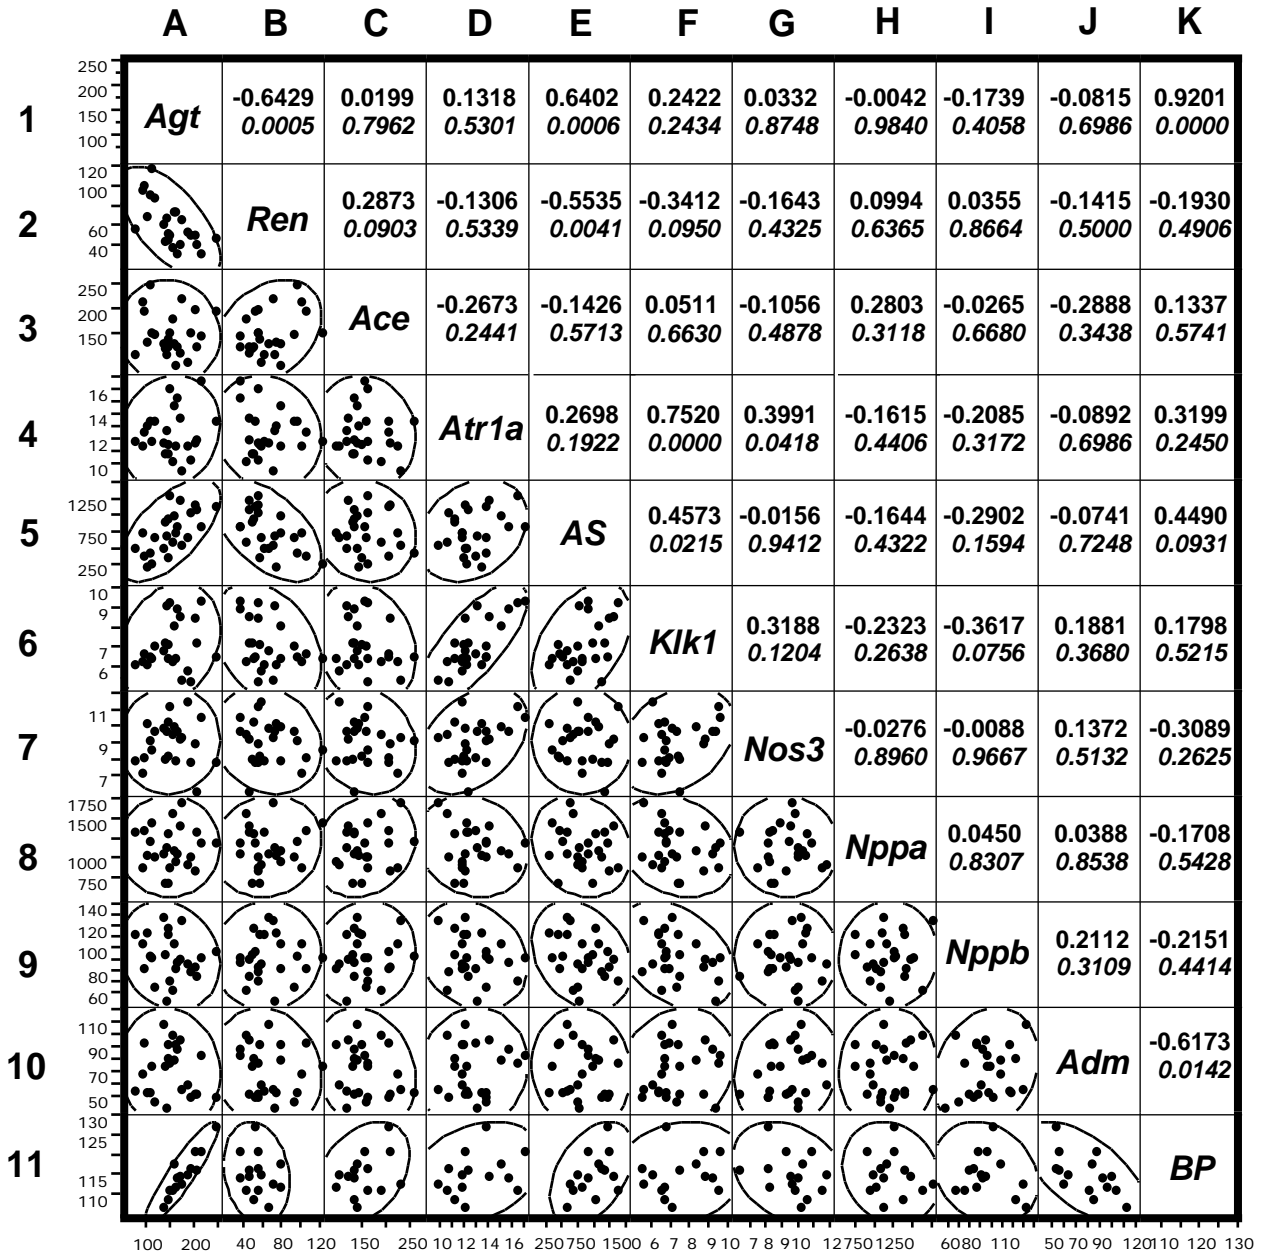

Supplement: pnas_072083799_4.pdf [file pnas_072083799_4.pdf]

# MALES

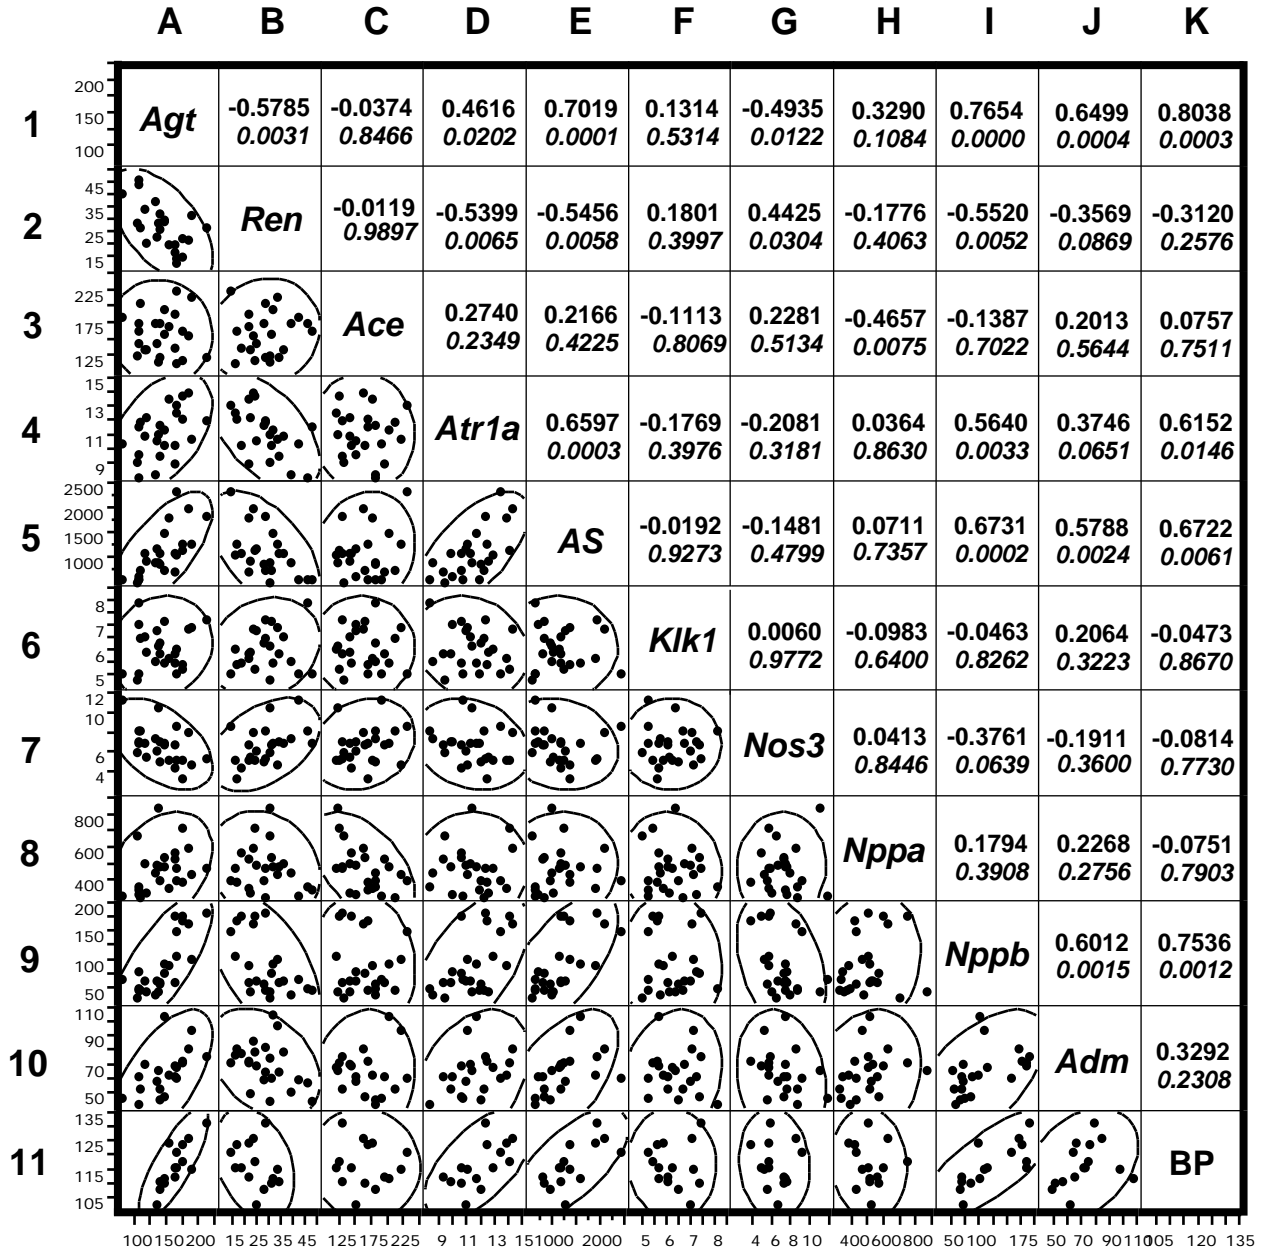

Supplement: pnas_072083799_5.pdf [file pnas_072083799_5.pdf]
